# Supplementary figures and images for: Cannabinoid combination targets NOTCH1-mutated T-cell acute lymphoblastic leukemia through the integrated stress response pathway
Source: eLife journal article supplement (doi:10.7554/elife.90854), 2023-12-14

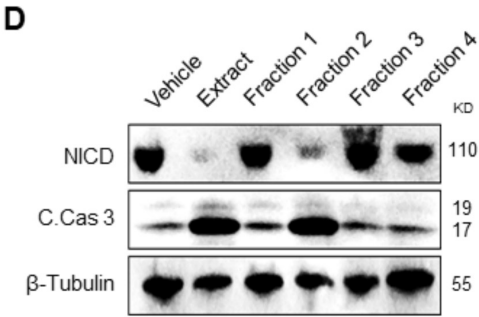

**NICD**

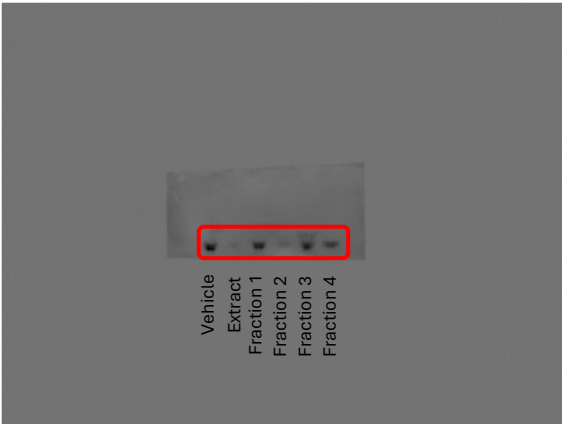

**C. Caspase 3**

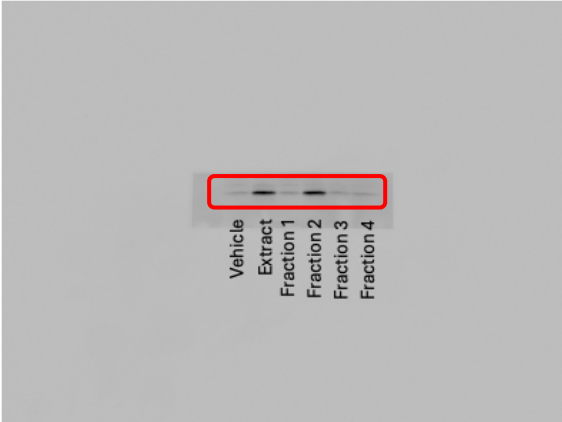

**Tubulin**

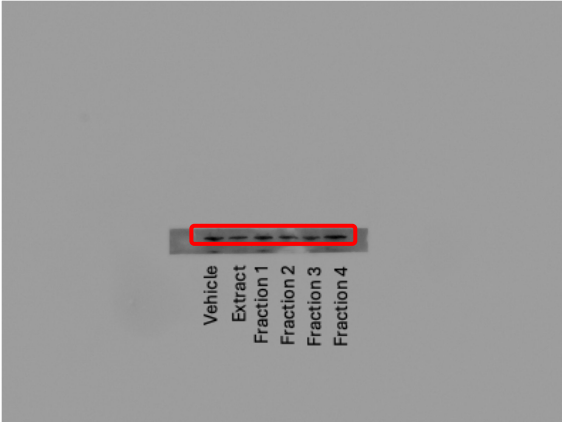

Supplement: fig1-data1 [file Figure 1 D.pdf › Fig 1 D/Figure 1 D.pdf]

I

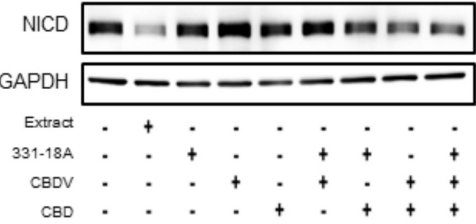

NICD

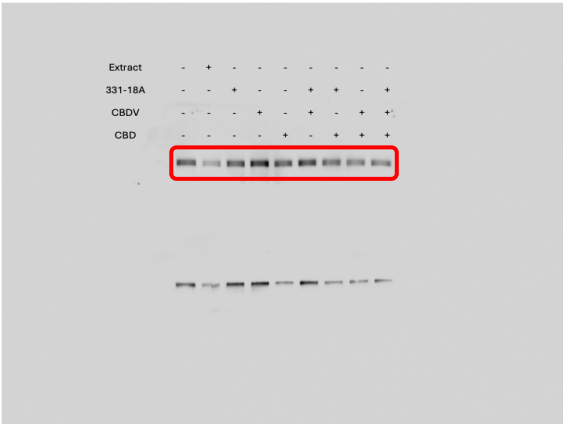

GAPDH

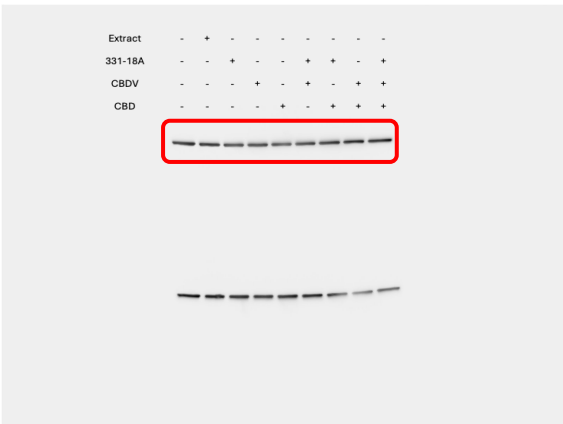

Supplement: fig1-data2 [file Figure 1 I.pdf › Fig 1 I/Figure 1 I.pdf]

C

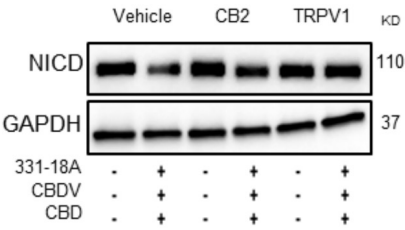

NICD

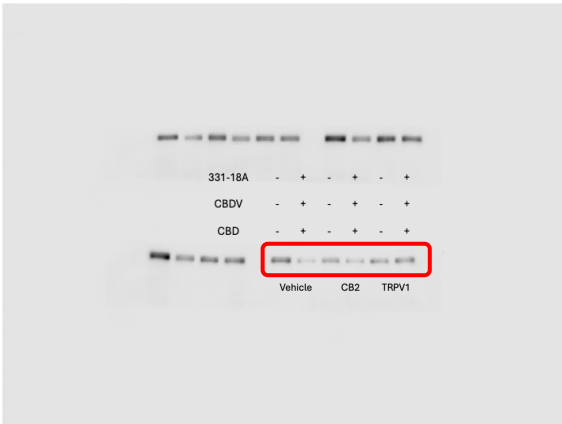

GAPDH

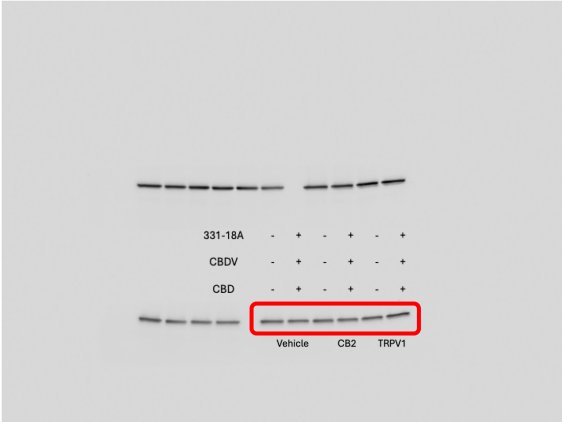

Supplement: fig2-data1 [file Figure 2 C 0624.pdf › Fig 2 - source data 1/Figure 2 C 0624.pdf]

NICD

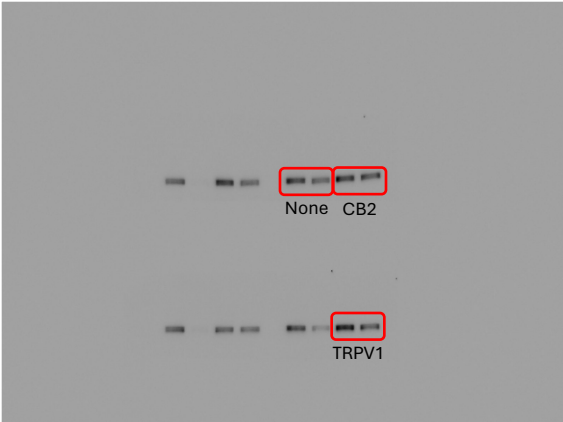

B

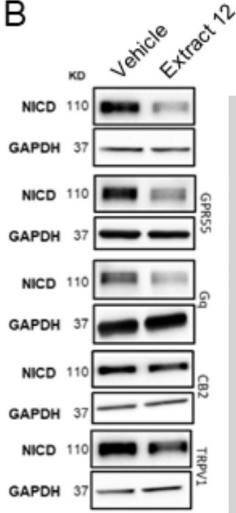

NICD

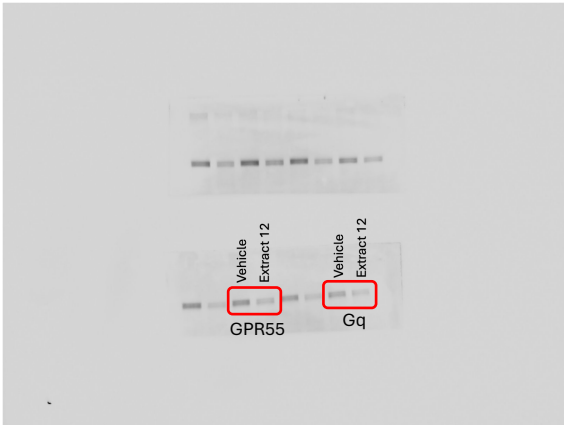

GAPDH

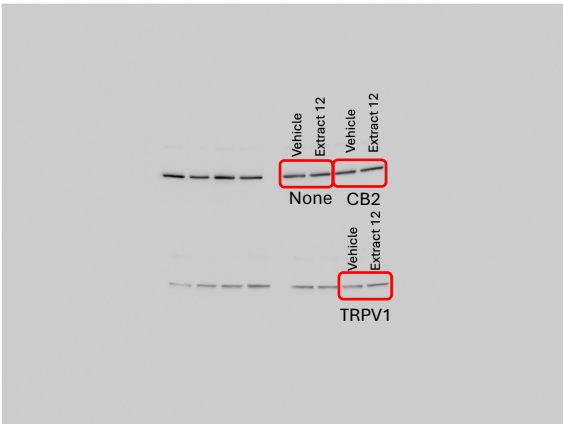

GAPDH

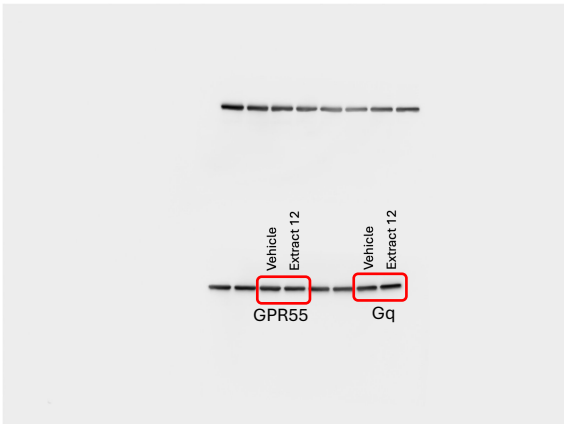

Supplement: fig2-figsupp1-data1 [file Figure S4 B.pdf › S4 B/Figure S4 B.pdf]

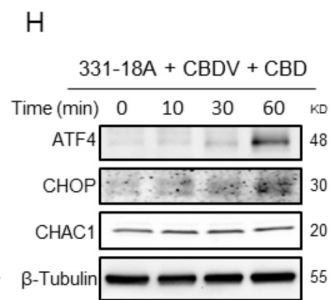

**ATF4**

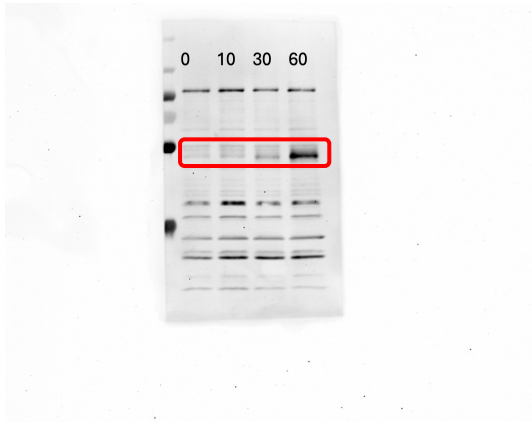

**CHOP**

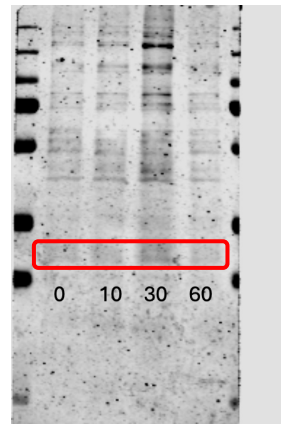

**CHAC1**

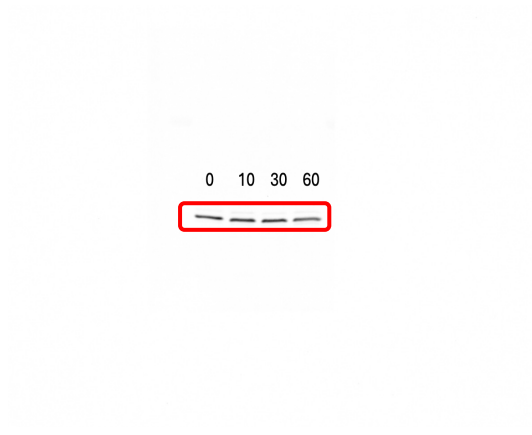

**$\beta$ -Tubulin**

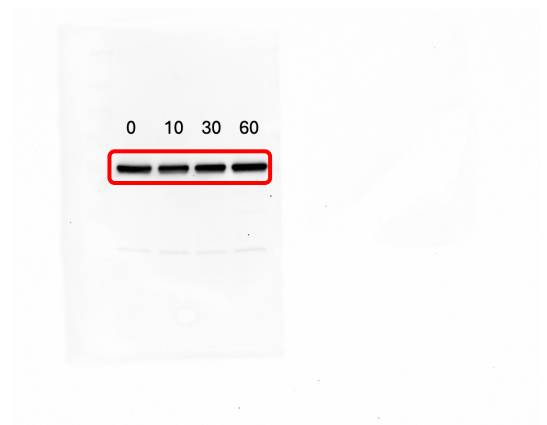

Supplement: fig3-data1 [file Figure 3 H.pdf › Fig 3 H/Figure 3 H.pdf]

I

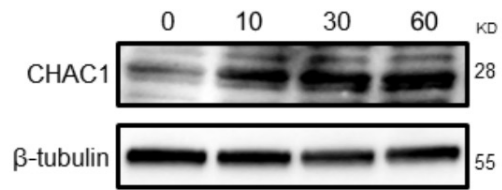

## CHAC1

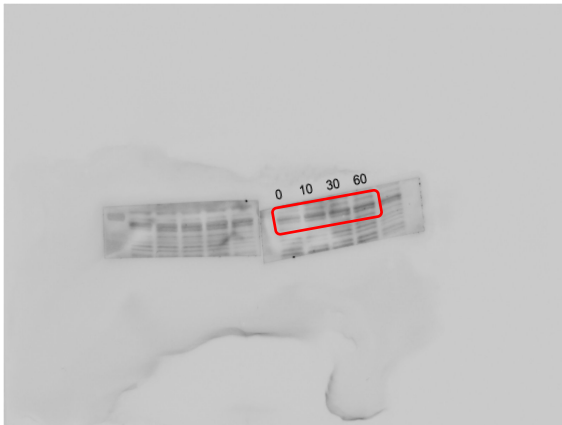

## B-Tubulin

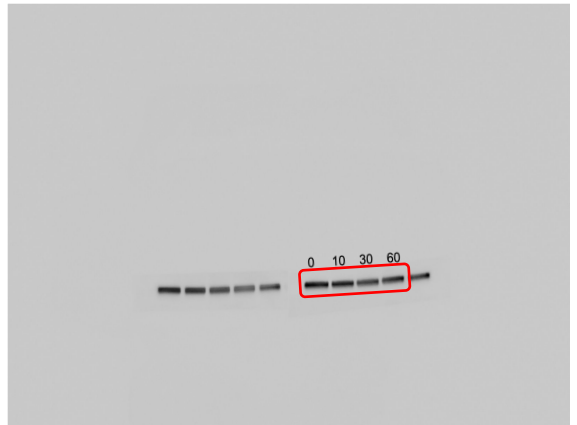

Supplement: fig3-figsupp1-data1 [file Figure S5 E.pdf › Figure S5 E.pdf]

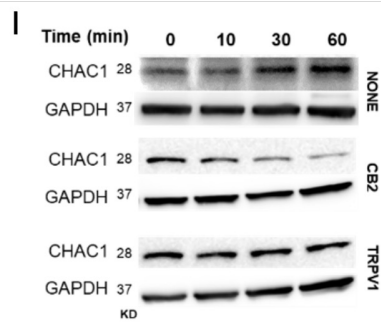

**CHAC1 - None**

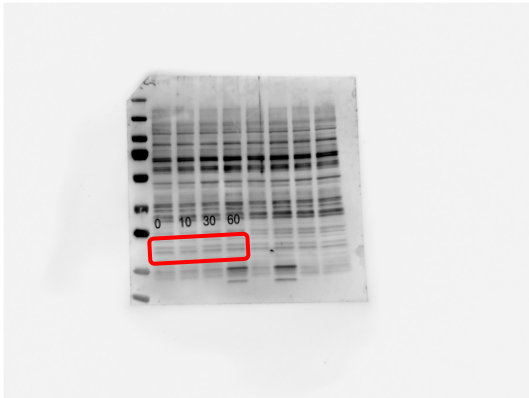

**GAPDH - None**

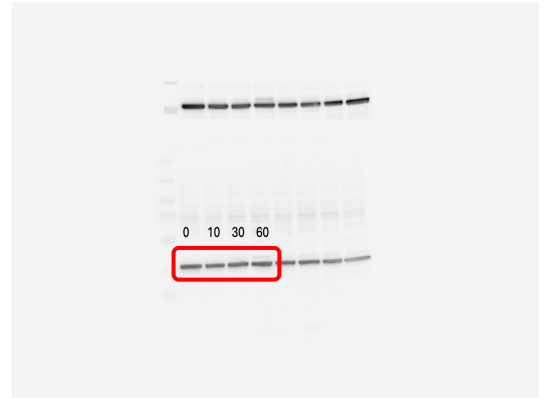

**CHAC1**

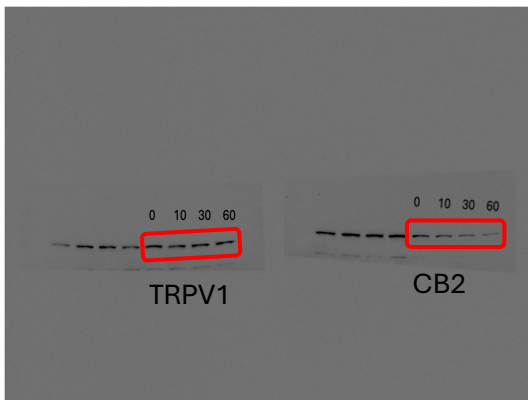

**GAPDH**

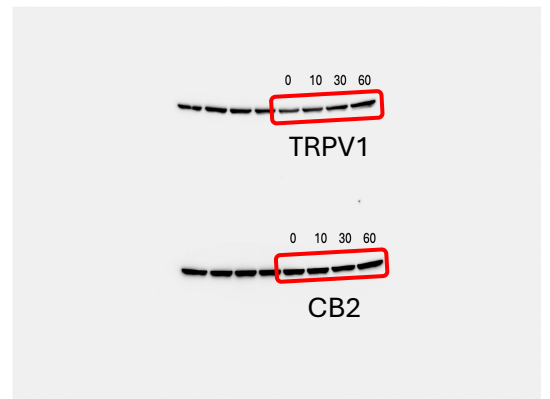

Supplement: fig3-figsupp1-data2 [file Figure 3S1SD2.pdf › Figure 3S1SD2.pdf]

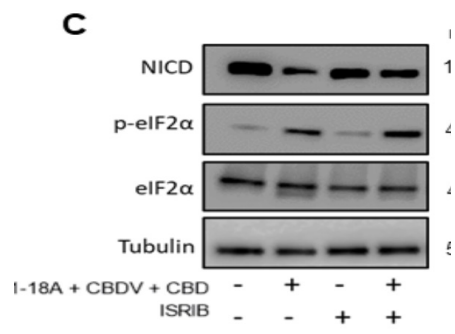

**NICD**

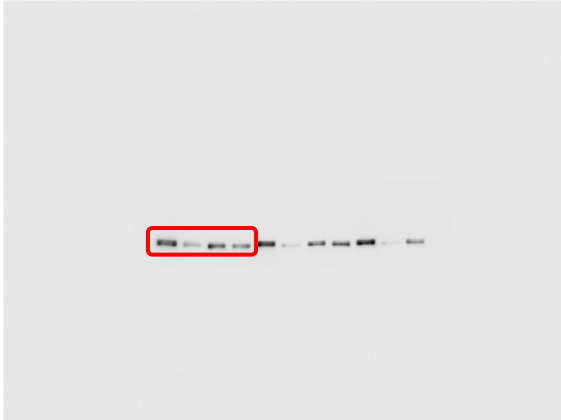

**P-eIF2α**

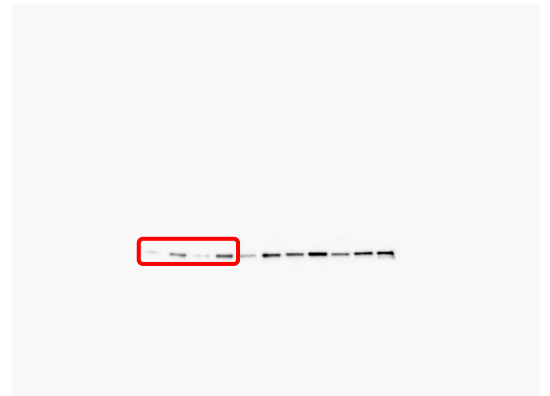

**eIF2α**

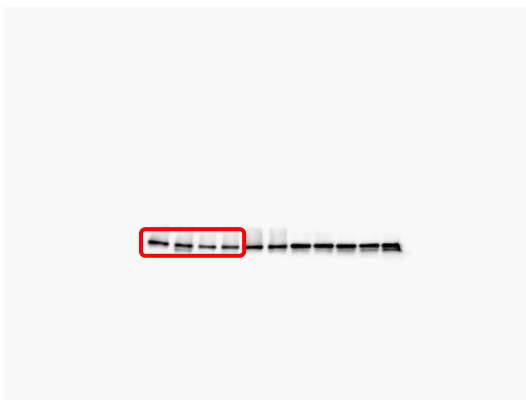

**β-Tubulin**

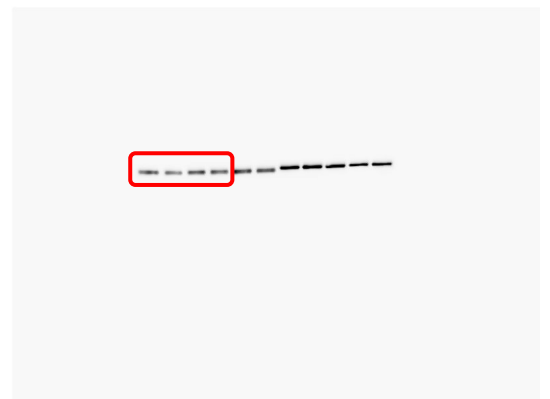

Supplement: fig4-data1 [file Figure 4 C.pdf › Fig 4 C/Figure 4 C.pdf]

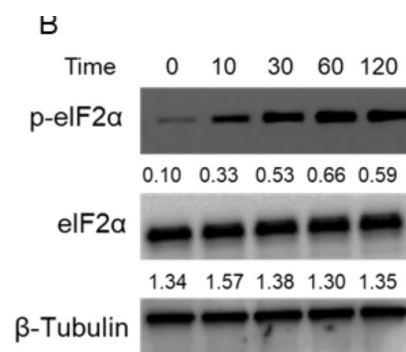

**P-eIF2 $\alpha$**

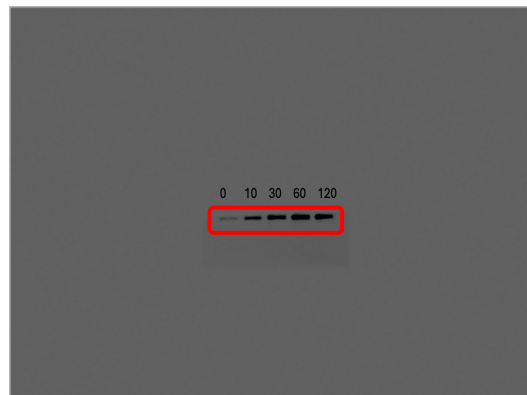

**eIF2 $\alpha$**

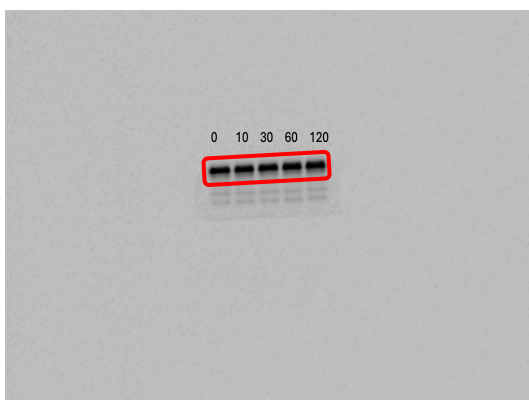

**$\beta$ -Tubulin**

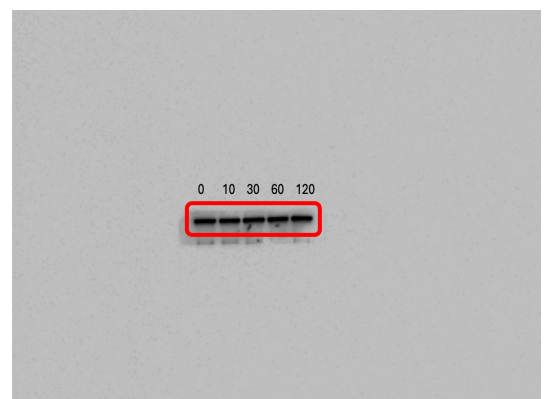

Supplement: fig4-figsupp1-data1 [file Figure S6 B.pdf › Fig S6 B/Figure S6 B.pdf]

E

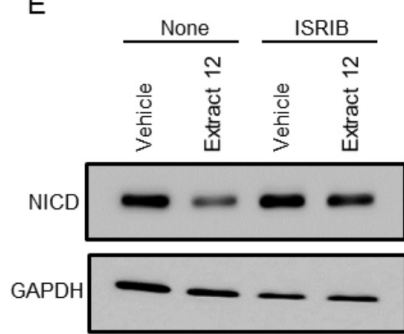

NICD

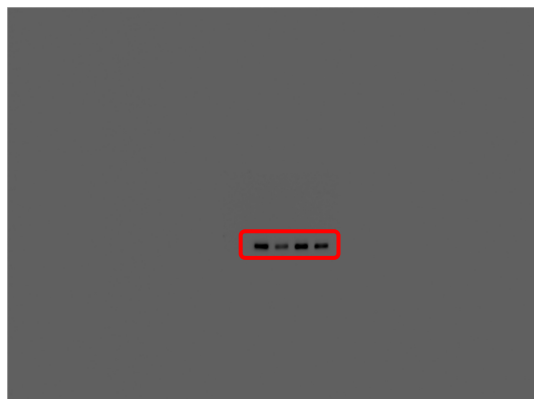

GAPDH

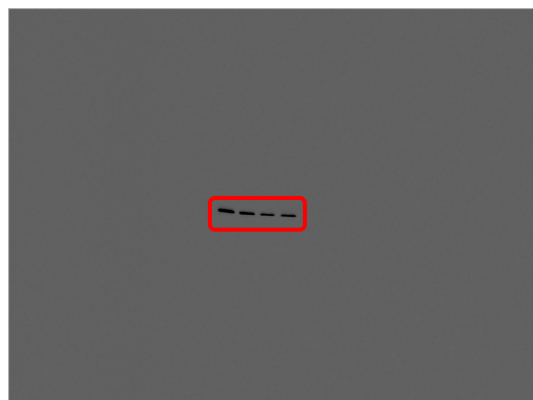

Supplement: fig4-figsupp1-data2 [file Figure S6 E.pdf › Fig S6 E/Figure S6 E.pdf]
